# Supplementary material for: A site-level comparison of lysimeter and eddy-covariance flux measurements of evapotranspiration
Source: Copernicus journal article supplement (doi:10.5194/hess-2016-252), 2016-06-15
Supplement: Supplementary file [file hess-2016-252-RC1-supplement.pdf]

**Journal:** HESS

**Title:** A site-level comparison of lysimeter and eddy-covariance flux measurements of evapotranspiration

**Author(s):** M. Hirschi et al.

**MS No.:** hess-2016-252

**MS Type:** Research article

### **General comments**

The paper reports a long-term (6.5 years) comparison of ground-based, direct evapotranspiration measurements, based on two different techniques (lysimetry and eddy covariance), both very well established yet with specific limitations.

The paper has a high scientific value, as datasets of such detail and consistency are very rare. Methods are discussed in great detail, as required by the comparison of diverse data and techniques. Great care has been exerted in homogeneizing and preparing data for the intercomparison at different time scales and during different seasons.

Conclusions are convincing and greatly help in establishing trustable, continuous, long-term monitoring of key hydrological processes.

### **Specific comments**

None.

### **Technical corrections**

None.
